# Supplementary material for: Effects of Arterial Stiffness and Carotid Intima-Media Thickness Progression on the Risk of Overweight/Obesity and Elevated Blood Pressure/Hypertension: a Cross-Lagged Cohort Study
Source: PubMed Central journal article supplement — Hypertension. 2021 Nov 17;79(1):159–69. doi: 10.1161/HYPERTENSIONAHA.121.18449 (PMC8654123; doi:10.1161/hypertensionaha.121.18449), 2021-11-17
Supplement: hyp-79-159-s003.pdf [file hyp-79-159-s003.pdf]

## **Hypertension Style Check List\_HYPE/2021/18449**

Title has sufficient phrase in the first 65 character for search engines. So, the title remains unchanged.

Abstract has been shortened.

We have included Data availability statement in line with TOP for the methods section.

We have included novelty and significance section

We have renamed the tables and figures in the supplementary appendix.

The twitter handles for the authors are: @UniEastFinland; @uef\_phcn; @CHERC\_UoE
